# Supplementary material
Source: Research Square preprint supplement (doi:10.21203/rs.3.rs-8863794/v1)
Supplement: Supplementary file 1 [file e47f0e4e3abb4cf4434f73ac.docx]

Characteristics of the respondants

What is your medical specialty?

- - Neurosurgery
  - Neurology
  - Medical Oncology
  - Radiation therapy
  - Other

What is your type of exercise?

- - University Hospital / Teaching Hospital
  - Regional Hospital / Regional Hospital Center/ General Hospital / Hospital (public) / Hospital Center
  - Private Non-Profit Hospital
  - Mixed
  - Private Clinic
  - Cancer Center
  - Other (specify) ..........

How many years have you been personally caring for patients with diffuse low-grade glioma..........

How many new patients with low-grade diffuse glioma do you personally manage?

- - Between 1 and 6 new patients per year
  - Between 7 and 15 new patients per year
  - Between 16 and 30 new patients per year
  - More than 30 new patients per year

Diagnosis and first surgery of tumor excision

When a low-grade diffuse glioma is discovered, what initial assessment do you systematically carry out?

- - Morphological MRI
  - IRM multimodal
  - Functional MRI
  - Speech therapy assessment
  - Neuropsychological assessment
  - Other (specify) ..........

Do you systematically perform a biopsy on your patients to decide on their management before the first excision surgery?

- - Yes
  - No

What is the proportion of your patients who are not eligible for initial tumor excision surgery (excluding biopsy)?

- - 0 %
  - 1 – 25 %
  - 26 – 50 %
  - 51 – 75 %
  - 76 – 99 %
  - 100 %

What technique do you use for excision surgery?

- - Awake surgery
  - Surgery under general anesthesia

How long does it take (in weeks) to see your patients again after they are discharged from hospital for tumor excision surgery?

Active Monitoring Management

After the first tumor excision surgery, what factors do you take into account to offer the patient management **only through active surveillance**?

- - Age of the patient
  - Absence of neurological deficits
  - Controlled epilepsy
  - Histomolecular subtype
  - Absence of residual tumor residue on postoperative MRI
  - Don't know
  - Other (specify) ..........

After the first tumor excision surgery, what is the average percentage of your patients who do not enter the active surveillance phase only?

- - 0 %
  - 1 – 25 %
  - 26 – 50 %
  - 51 – 75 %
  - 76 – 99 %
  - 100 %

On average, how often do you follow your patients with low-grade diffuse glioma

| **During the active surveillance phase only** | **Within the first 5 years after completion of chemotherapy and/or radiotherapy treatment** |
| --- | --- |
| - One consultation per month | - One consultation per month |
| - A consultation every 3 months | - A consultation every 3 months |
| - A consultation every 6 months | - A consultation every 6 months |
| - A consultation every 9 months | - A consultation every 9 months |
| - Other (specify) .......... | - Other (specify) .......... |

What tests do you perform during follow-up consultations and how often?

| **During the active surveillance phase only** | **In the first 5 years following the treatment phase with chemotherapy and/or radiotherapy** |
| --- | --- |
| - IRM multimodal - At each consultation - One consultation out of 2 - One-off | - IRM multimodal - At each consultation - One consultation out of 2 - One-off |
| - Morphological MRI - At each consultation - One consultation out of 2 - One-off | - Morphological MRI - At each consultation - One consultation out of 2 - One-off |
| - PET scan - At each consultation - One consultation out of 2 - One-off | - PET scan - At each consultation - One consultation out of 2 - One-off |
| - Standardised assessment of quality of life - At each consultation - One consultation out of 2 - One consultation per year - One-off - Until standardization - In the event of a patient complaint | - Standardised assessment of quality of life - At each consultation - One consultation out of 2 - One consultation per year - One-off - Until standardization - In the event of a patient complaint |
| - Other (specify) .......... | - Other (specify) .......... |

How often do you measure tumor volume for evolutionary monitoring?

- At each consultation
- One consultation out of 2
- Punctually
- Never
- I can't measure it

Management in case of progression or recurrence

In cases where possible, do you perform iterative excision surgeries?

- - Yes
    - - - What proportion of these patients had 2 excision surgeries before any chemotherapy and/or radiotherapy treatment?

0 %

1 – 25 %

26 – 50 %

51 – 75 %

76 – 99 %

100 %

- - No

If the disease evolves and requires treatment other than surgery, what do you prescribe to your patients as a first-line treatment?

| **In case of astrocytoma** | **In case of oligodendroglioma** |
| --- | --- |
| - - Chemotherapy alone:   - Indicate the proportion of patients concerned:   - 0 %   - 1 – 25 %   - 26 – 50 %   - 51 – 75 %   - 76 – 99 %   - 100 %   Indicate the preferred type of chemotherapy:   - - - Procarbazine, CCNU and vincristine (PCV)     - Mean number of cycles: ......     - Temozolomide     - Average number of cycles: ...... | - - Chemotherapy alone:   - Indicate the proportion of patients concerned:   - 0 %   - 1 – 25 %   - 26 – 50 %   - 51 – 75 %   - 76 – 99 %   - 100 %   Indicate the preferred type of chemotherapy:   - - Procarbazine, CCNU and vincristine (PCV)   - Mean number of cycles: ......     - Temozolomide     - Average number of cycles: ...... |
| - - Radiotherapy alone   - ...Average % of patients in your active queue   - Average number of sessions: ......   - Among these patients, what is the average percentage of patients treated with proton therapy? | - - Radiotherapy alone   - ...Average % of patients in your active queue   - Average number of sessions: ......   - Among these patients, what is the average percentage of patients treated with proton therapy? |
| - - Chemoradiotherapy   - Indicate the proportion of patients concerned:   - 0 %   - 1 – 25 %   - 26 – 50 %   - 51 – 75 %   - 76 – 99 %   - 100 %   Indicate the preferred type of chemotherapy:   - Procarbazine, CCNU and vincristine (PCV)   Mean number of cycles: ......   - Temozolomide   Average number of cycles: ...... | - - Chemoradiotherapy   - Indicate the proportion of patients concerned:   - 0 %   - 1 – 25 %   - 26 – 50 %   - 51 – 75 %   - 76 – 99 %   - 100 %   Indicate the preferred type of chemotherapy:   - - - Procarbazine, CCNU and vincristine (PCV)   Mean number of cycles: ......   - Temozolomide   Average number of cycles: ...... |
| - - IDH inhibitors available in derogatory access or clinical trialsat   - Indicate the proportion of patients concerned:   - 0 %   - 1 – 25 %   - 26 – 50 %   - 51 – 75 %   - 76 – 99 %   - 100 % | - - IDH inhibitors available in derogatory access or clinical trialsat   - Indicate the proportion of patients concerned:   - 0 %   - 1 – 25 %   - 26 – 50 %   - 51 – 75 %   - 76 – 99 %   - 100 % |
| Other (specify) .......... | - Other (specify) .......... |

Medical Needs

Do you consider that the current therapeutic offer (radiotherapy and/or chemotherapy) allows for optimal management of patients with low-grade diffuse glioma?

- - Yes
  - No
  - Can you rank the following reasons from most important (1) to least important (4) in your opinion?
    - - - Adverse effects associated with available treatments are too great1
        - Current treatments are not effective
        - The quality of life of patients is greatly impacted by the implementation of these treatments
        - Other (specify) ..........

On a scale of 0 (no need) to 10 (essential need), how much do you think there is a need for new treatment options to control disease progression in patients who do not immediately need chemotherapy and/or radiation therapy............
